# Supplementary material for: Patient satisfaction with HIV services in Vietnam: Status, service models and association with treatment outcome
Source: PubMed Central journal article supplement (PMC6839840; doi:10.1371/journal.pone.0223723), 2019-11-08
Supplement: pone.0223723.s001.pdf [file pone.0223723.s001.pdf]

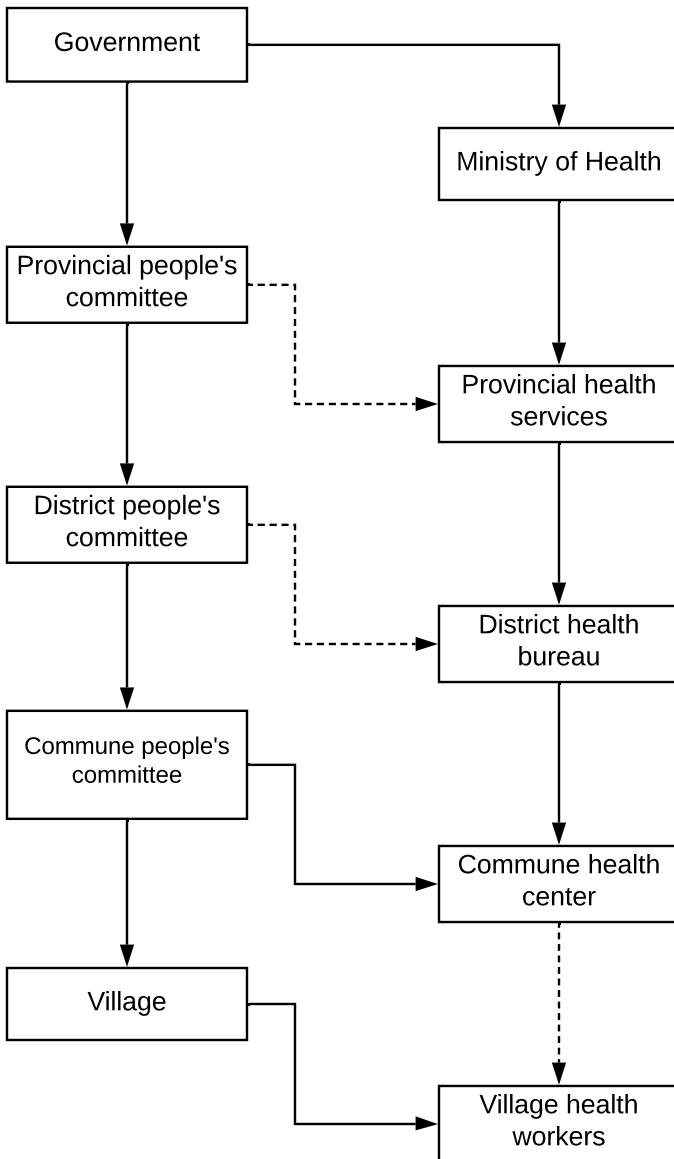

—————> Official management

-----> Professional supervision

**S1 Fig. Outline of Vietnamese health delivery models**
